# Supplementary material
Source: HighWire-hosted journal article supplement (http://jneurosci.org/highwire/filestream/598950/field_highwire_adjunct_files/3/Suppl_table_1.pdf)
Supplement: Suppl_table_1.pdf [file Suppl_table_1.pdf]

**Supplementary table 1:** Cell type specific markers in GLT1<sup>+</sup>/Gfap-GFP<sup>+/-</sup> cells

| Gene Title                                     | Gene symbol   | GLT1 <sup>+</sup> /Gfap-GFP <sup>+</sup> |            | GLT1 <sup>+</sup> /Gfap-GFP <sup>-</sup> |            | Probe Set ID |
|------------------------------------------------|---------------|------------------------------------------|------------|------------------------------------------|------------|--------------|
|                                                |               | P-value                                  | Ratio      | P-value                                  | Ratio      |              |
| <b>Astrocytes</b>                              |               |                                          |            |                                          |            |              |
| Aquaporin 4                                    | <i>Aqp4</i>   | 0.0065                                   | 6.67±0.17  | 0.0038                                   | 5.65±0.14  | 1434449_at   |
| Aquaporin 9                                    | <i>Aqp9</i>   | 0.0298                                   | 4.73±0.16  | 0.0230                                   | 4.01±0.32  | 1424011_at   |
| Glial fibrillary acidic protein                | <i>Gfap</i>   | 0.0044                                   | 7.35±1.17  |                                          | 1.98±2.98  | 1440142_s_at |
| S100 protein, beta polypeptide                 | <i>S100b</i>  | 0.0010                                   | 5.14±0.22  | 0.0012                                   | 4.85±0.51  | 1434342_at   |
| Solute carrier family 1, 2 (GLT1)              | <i>Slc1a2</i> | 0.0017                                   | 6.34±0.04  | 0.0012                                   | 5.58±0.39  | 1458314_at   |
| Tenascin C                                     | <i>Tnc</i>    |                                          | 2.68±0.78  |                                          | 0.80±1.47  | 1416342_at   |
| <b>Progenitor</b>                              |               |                                          |            |                                          |            |              |
| Achaete-scute complex -like 1                  | <i>Ascl1</i>  |                                          | -1.99±1.63 | 0.0191                                   | -2.80±0.78 | 1437086_at   |
| Chondroitin sulfate proteoglycan 4 (NG2)       | <i>Cspg4</i>  | 0.0007                                   | -5.36±0.30 | 0.0021                                   | -4.65±0.81 | 1423341_at   |
| Doublecortin                                   | <i>Dcx</i>    |                                          | -1.98±0.97 | 0.0329                                   | -1.69±0.44 | 1418139_at   |
| Hairy and enhancer of split 1                  | <i>Hes1</i>   |                                          | -0.87±0.34 | 0.0230                                   | -0.82±0.14 | 1418102_at   |
| Nestin                                         | <i>Nes</i>    | 0.0185                                   | -3.81±0.97 | 0.0094                                   | -2.80±0.75 | 1418289_at   |
| SRY-box containing gene 2                      | <i>Sox2</i>   | 0.0007                                   | 4.54±0.22  | 0.0007                                   | 3.65±0.32  | 1416967_at   |
| Platelet derived growth factor receptor, alpha | <i>Pdgfra</i> |                                          | -5.47±2.77 | 0.0244                                   | -3.30±1.26 | 1421917_at   |
| Oligodendrocyte transcription factor 1         | <i>Olig1</i>  | 0.0356                                   | 2.07±0.36  | 0.0026                                   | 3.54±0.20  | 1416149_at   |
| Oligodendrocyte transcription factor 2         | <i>Olig2</i>  | 0.0312                                   | 2.42±0.82  | 0.0028                                   | 3.25±0.63  | 1416232_at   |
| <b>Microglial</b>                              |               |                                          |            |                                          |            |              |
| CD68 antigen                                   | <i>Cd68</i>   | 0.0225                                   | -3.59±1.01 | 0.0094                                   | -1.36±0.26 | 1449164_at   |
| CD86 antigen                                   | <i>Cd86</i>   | 0.0476                                   | -4.53±1.80 | 0.0178                                   | -2.03±0.46 | 1420404_at   |
| Integrin alpha M                               | <i>Itgam</i>  |                                          | -0.59±0.80 |                                          | -1.06±1.56 | 1422046_at   |
| <b>Neuron</b>                                  |               |                                          |            |                                          |            |              |
| ELAV like 4 (Hu antigen D)                     | <i>Elavl4</i> |                                          | -1.21±0.42 | 0.0969                                   | -1.48±0.78 | 1452894_at   |
| Neurofilament, heavy polypeptide               | <i>Nefh</i>   |                                          | -0.72±1.71 |                                          | -0.31±1.96 | 1424847_at   |
| Tubulin, alpha 1                               | <i>Tubal1</i> |                                          | -0.17±0.28 | 0.0363                                   | 0.33±0.03  | 1418884_x_at |

| Gene Title                                       | Gene symbol  | GLT1 <sup>+</sup> /Gfap-GFP <sup>+</sup> |            | GLT1 <sup>+</sup> /Gfap-GFP <sup>-</sup> |            | Probe Set ID |
|--------------------------------------------------|--------------|------------------------------------------|------------|------------------------------------------|------------|--------------|
|                                                  |              | P-value                                  | Ratio      | P-value                                  | Ratio      |              |
| <b>Oligodendrocyte</b>                           |              |                                          |            |                                          |            |              |
| Cyclic nucleotide phosphodiesterase 1            | <i>Cnp1</i>  | 0.0410                                   | 0.84±0.27  | 0.0005                                   | 2.65±0.11  | 1418980_a_at |
| Myelin and lymphocyte protein                    | <i>Mal</i>   | 0.0037                                   | -2.23±0.12 | 0.0057                                   | 1.46±0.23  | 1432558_a_at |
| Myelin basic protein                             | <i>Mbp</i>   |                                          | -1.33±0.78 |                                          | 0.83±0.46  | 1425264_s_at |
| Myelin-associated oligodendrocytic basic protein | <i>Mobp</i>  |                                          | -0.65±0.71 | 0.0012                                   | 2.61±0.29  | 1450088_a_at |
| <b>Endothelial and smooth muscle cell</b>        |              |                                          |            |                                          |            |              |
| Cadherin 5                                       | <i>Cdh5</i>  |                                          | -1.79±1.46 |                                          | -2.06±1.51 | 1433956_at   |
| CD34 antigen                                     | <i>Cd34</i>  | 0.0039                                   | -4.93±0.71 | 0.0005                                   | -3.82±0.19 | 1416072_at   |
| Von Willebrand factor                            | <i>Vwf</i>   | 0.0153                                   | -3.55±0.69 | 0.0026                                   | -3.22±0.26 | 1435386_at   |
| Actin, alpha 2, smooth muscle                    | <i>Acta2</i> | 0.0103                                   | -5.80±1.26 | 0.0006                                   | -5.24±0.49 | 1416454_s_at |

In each group there were three independent biological samples. All data was MAS5 normalized, filtered and log-normalized. Each group was baselined to the GLT1<sup>-</sup>/Gfap-GFP<sup>-</sup> group. If there were several probesets available for one marker gene, the most significant probeset is presented here. P-value = non-paired Student's t-test with Benjamini-Hochberg FDR correction. Ratio = the ratio between GLT1<sup>+</sup>/Gfap-GFP<sup>+/-</sup> (n = 6) and GLT1<sup>-</sup>/Gfap-GFP<sup>-</sup> (n = 3) (mean±STDV).
